# Supplementary material for: A Hierarchical Dimensional Model of Neurodevelopmental and Mental Health Traits Predicts Adaptive Functioning and Quality of Life in Youth
Source: Research Square preprint supplement (doi:10.21203/rs.3.rs-8197536/v1), 2025-11-26
Supplement: Supplementary file 1 [file 02037fc51400f12f79fe09cd.docx]

**Supplementary Materials**

**Supplementary Materials A – Caregiver Demographics and group-based patterns and differences on demographic, model, and outcome variables**

**Table S1. *Caregiver Demographics***

|  |  | Child Best Clinical Estimate Groups# | | | |
| --- | --- | --- | --- | --- | --- |
|  | Total Sample  (*N*child = 372) | Autistic  (*n*child = 48) | ADHD  (*n*child = 71) | AuDHD  (*n*child = 145) | Neurotypical  (*n*child = 106) |
| **Primary participating parent age (years)** | | | | | |
| Mean (SD) | 39.30 (5.20) | 37.78 (3.48) | 42.35 (5.89) | 38.29 (5.71) | 39.95 (4.42) |
| Range | 26.17 - 51.32 | 26.79 - 43.32 | 30.78 - 51.28 | 26.17 - 51.32 | 26.64 - 50.98 |
| Missing (%) | *n* = 241 (64.8%) | *n* = 27 (56.3%) | *n* = 53 (74.6%) | *n* = 94 (64.8%) | *n* = 66 (62.3%) |
| **Primary participating parent relationship to child*** | | | | | |
| Mother (%) | *n* = 363 (97.6%) | *n* = 45 (93.8%) | *n* = 70 (98.6%) | *n* = 145 (100%) | *n* = 101 (95.3%) |
| Father (%) | *n* = 9 (2.4%) | *n* = 3 (6.3%) | *n* = 1 (1.4%) | *n* = 0 (0%) | *n* = 5 (4.7%) |
| **Biological mother autism or ADHD diagnostic status** | | | | | |
| Diagnosed autistic (%) | *n* = 7 (1.9%) | *n* = 2 (4.2%) | *n* = 0 (0%) | *n* = 3 (2.1%) | *n* = 2 (1.9%) |
| Diagnosed ADHD (%) | *n* = 26 (7.0%) | *n* = 1 (2.1%) | *n* = 4 (5.6%) | *n* = 19 (13.1%) | *n* = 2 (1.9%) |
| Missing or unknown (%) | *n* = 160 (43.0%) | *n* = 16 (33.3%) | *n* = 27 (38.0%) | *n* = 34 (23.4%) | *n* = 83 (78.3%) |
| **Biological mother other neurodevelopmental or mental health diagnoses^** | | | | | |
| Anxiety (%) | *n* = 59 (15.9%) | *n* = 9 (18.8%) | *n* = 9 (12.7%) | *n* = 37 (25.5%) | *n* = 4 (3.8%) |
| Depression (%) | *n* = 49 (13.2%) | *n* = 5 (10.4%) | *n* = 12 (16.9%) | *n* = 27 (18.6%) | *n* = 5 (4.7%) |
| PTSD or C-PTSD (%) | *n* = 14 (3.8%) | *n* = 3 (6.3%) | *n* = 1 (1.4%) | *n* = 9 (6.2%) | *n* = 1 (.9%) |
| Other mental health diagnosis (%) | *n* = 13 (3.5%) | *n* = 2 (4.2%) | *n* = 2 (2.8%) | *n* = 7 (5.1%) | *n* = 2 (1.9%) |
| Other neurodevelopmental diagnosis (%) | *n* = 5 (1.3%) | *n* = 1 (2.1%) | *n* = 0 (0%) | *n* = 4 (2.8%) | *n* = 0 (0%) |
| Other diagnosis, not specified (%) | *n* = 39 (10.5%) | *n* = 8 (16.7%) | *n* = 8 (11.3%) | *n* = 21 (14.5%) | *n* = 2 (1.9%) |
| **Biological mother highest level of education** | | | | | |
| Completed high school or less (%) | *n* = 30 (8.1%) | *n* = 3 (6.3%) | *n* = 2 (2.8%) | *n* = 21 (14.5%) | *n* = 3 (2.8%) |
| Trade apprenticeship (%) | *n* = 8 (2.2%) | *n* = 0 (0%) | *n* = 2 (2.8%) | *n* = 6 (4.1%) | *n* = 0 (0%) |
| Technical diploma/certificate (%) | *n* = 63 (16.9%) | *n* = 12 (25.0%) | *n* = 9 (12.7%) | *n* = 37 (25.5%) | *n* = 5 (4.7%) |
| University degree (%) | *n* = 54 (14.5%) | *n* = 9 (18.8%) | *n* = 17 (23.9%) | *n* = 19 (13.1%) | *n* = 8 (7.5%) |
| Postgraduate university degree (%) | *n* = 60 (16.1%) | *n* = 8 (16.7%) | *n* = 14 (19.7%) | *n* = 30 (20.7%) | *n* = 8 (7.5%) |
| Missing or other (%) | *n* = 155 (41.7%) | *n* = 16 (33.3%) | *n* = 27 (36.6%) | *n* = 32 (22.1%) | *n* = 82 (77.5%) |
| **Biological father autism or ADHD diagnostic status** | | | | | |
| Diagnosed Autistic (%) | *n* = 4 (1.1%) | *n* = 1 (2.1%) | *n* = 0 (0%) | *n* = 3 (2.1%) | *n* = 0 (0%) |
| Diagnosed ADHD (%) | *n* = 13 (3.5%) | *n* = 1 (2.1%) | *n* = 2 (2.8%) | *n* = 10 (6.9%) | *n* = 0 (0%) |
| Missing or other (%) | *n* = 157 (42.2%) | *n* = 16 (33.3%) | *n* = 27 (38.0%) | *n* = 157 (42.2%) | *n* = 83 (78.3%) |
| **Biological father other neurodevelopmental or mental health diagnoses^** | | | | | |
| Anxiety (%) | *n* = 27 (7.3%) | *n* = 5 (10.4%) | *n* = 5 (7.0%) | *n* = 14 (9.7%) | *n* = 2 (1.9%) |
| Depression (%) | *n* = 27 (7.3%) | *n* = 5 (10.4%) | *n* = 3 (4.2%) | *n* = 17 (11.7%) | *n* = 1 (.9%) |
| PTSD or C-PTSD (%) | *n* = 5 (1.3%) | *n* = 1 (2.1%) | *n* = 1 (1.4%) | *n* = 3 (2.1%) | *n* = 0 (0%) |
| Other mental health diagnosis (%) | *n* = 6 (1.61%) | *n* = 0 (0%) | *n* = 0 (0%) | *n* = 6 (4.2%) | *n* = 1 (.9%) |
| Other neurodevelopmental diagnosis (%) | *n* = 3 (.8%) | *n* = 0 (0%) | *n* = 0 (0%) | *n* = 2 (1.4%) | *n* = 0 (0%) |
| Other diagnosis, not specified (%) | *n* = 22 (5.9%) | *n* = 3 (6.3%) | *n* = 2 (2.8%) | *n* = 16 (11.0%) | *n* = 1 (.9%) |
| **Biological father highest level of education** | | | | | |
| Completed high school or less (%) | *n* = 47 (12.6%) | *n* = 5 (10.4%) | *n* = 11 (15.5%) | *n* = 24 (16.6%) | *n* = 6 (5.7%) |
| Trade apprenticeship (%) | *n* = 33 (8.9%) | *n* = 2 (4.2%) | *n* = 6 (8.5%) | *n* = 24 (16.6%) | *n* = 1 (.9%) |
| Technical diploma/certificate (%) | *n* = 53 (14.2%) | *n* = 11 (22.9%) | *n* = 9 (12.7%) | *n* = 27 (18.6%) | *n* = 5 (4.7%) |
| University degree (%) | *n* = 52 (14.0%) | *n* = 9 (18.8%) | *n* = 13 (19.3%) | *n* = 21 (14.5%) | *n* = 9 (8.5%) |
| Postgraduate university degree (%) | *n* = 24 (6.5%) | *n* = 3 (6.3%) | *n* = 4 (5.6%) | *n* = 14 (9.7%) | *n* = 3 (2.8%) |
| Missing or other (%) | *n* = 163 (43.9%) | *n* = 18 (37.5%) | *n* = 28 (42.2%) | *n* = 35 (24.2%) | *n* = 82 (77.5%) |

*Note*. * Biological mother and father inclusive of donors; # = Other Neurodevelopmental (*n* = 2) not included here; ^ Total sum of endorsed diagnoses may exceed sample size due to some individuals endorsing more than one diagnosis; ADHD = attention-deficit/hyperactivity disorder; AuDHD = co-occurring autism and ADHD

This section references Table 1 and Extended Data Tables 1 and 2 from the main text and Table S1.

A total of *N* = 372 (*n*male = 216, 58.1%) participating children from 261 families, between the ages of 7-13 years, were included in this study. Children were mostly from a Caucasian/White ancestry (*n* = 337, 90.6%). Our sample also included children with a wide breadth of intellectual functioning (FSIQ range 49-141).

Most primary participating caregivers were the children’s mother (*n* = 363, 97.6%). There was substantial missing data across nearly all caregiver demographic variables. From the available data, most caregivers were approaching middle age (*M* = 39.30 years, *SD* = 5.20 years) and had completed some form of further vocational or educational training (mothers = 49.7%, fathers = 43.6%). Overall endorsed autism and ADHD diagnoses amongst caregivers were roughly consistent with population estimates (autism range: 1.1-1.9%, ADHD range: 3.5-7%), however, it is acknowledged that this may be an underestimation of the true prevalence within our sample. This is due in part to the known heritability of autism and ADHD, and thus elevated likelihood of diagnoses amongst caregivers, in addition to missing data from nearly half of all families for these questions.

According to the best clinical estimates, the largest primary diagnostic group consisted of AuDHD participants (38.9%), followed by the neurotypical (28.5%), ADHD (19.1%), autistic (12.9%), and “other neurodevelopmental” (*n* = 2; 0.5%) groups. The two participants whose primary diagnostic classification was “other neurodevelopmental” were originally enrolled in the MAGNET Project with suspected autistic and/or ADHD traits but were instead considered to meet criteria for other neurodevelopmental diagnoses during their case reviews. Demographic and model variable information for these participants are not reported here due to the small sample size and potentially re-identifiable nature of their data.

There were no significant differences between the remaining four diagnostic groups in child age (*F*(3, 366) = 2.21, *p* = .087) and parental educational attainment (mothers’ educational attainment: *χ*2(15, *N* = 215) = 23.40, *p* = .076; fathers’ educational attainment: *χ*2(15, *N* = 215) = 13.60, *p* = .517). Participants in the three clinical groups (i.e., autistic, ADHD, and AuDHD) were equivalently matched on intellectual ability (*F*(2, 254) = 2.93, *p* = .055) and rates of co-occurring diagnoses (first secondary best clinical estimate: *χ*2(8, *N* = 264) = 10.27, *p* = .247; second secondary best clinical estimate: *χ*2(8, *N* = 264) = 13.60, *p* = .093). Proportionally, there were significantly more female participants in the neurotypical group (*χ*2(3, *N* = 370) = 18.27, *p* < .001, Cramer’s *V* = .222) than in the other groups. Parents of autistic participants also tended to be younger than parents of ADHD participants (*p* = .036, Hedges’ *g* = .90), but no other significant differences in parental age were detected between groups.

Descriptive statistics for all predictor and outcome variables, split by best clinical estimate group, are displayed in Tables 5 and 6 respectively. Due to the volume of results, these descriptive statistics are only briefly discussed here. On most measures of neurodevelopmental traits, participants in the AuDHD group received the highest levels of trait endorsement (typically within ‘Elevated’ ranges) whereas participants in the neurotypical group received the lowest (typically within population average range). Substantially fewer significant differences were detected between groups on ratings of mental health.

Although participants from the neurotypical group were rated as having stronger adaptive functioning skills than participants in the clinical groups (all *p*s < .001), the clinical groups demonstrated a heterogeneous pattern of comparative strengths and weaknesses. For example, post-hoc Games-Howell analyses revealed that participants classified as autistic were rated as possessing equivalent everyday communication and independent living skills as those in the ADHD and AuDHD groups (i.e., Autism = ADHD = AuDHD; *p*Communication = .805; *p*Daily Living Skills = .473), whereas the autistic and AuDHD groups appeared to share a similar socialisation profile (*p* = .391) that was significantly different to that of the ADHD group (i.e., Autism = AuDHD, both < ADHD; *p*Autism = .008, Hedges’ *g* = .66; *p*AuDHD < .001, Hedges’ *g* = .99). This suggests that autistic and ADHD neurotypes confer slightly different baselines across the various domains of adaptive functioning, and that the adaptive functioning profiles of AuDHD individuals do not always reflect equal contributions from each neurotype (i.e., AuDHD ≠ Autism + ADHD). Finally, there were significant but inconsistent group differences on all CHIP-CE subscales, which raises the possibility that a child’s quality of life is associated with more than just their neurotype.

**Supplementary Materials B – Table of factor determinacy coefficients**

Table S2. Factor Determinacy Coefficients

| Level | Factor number | | | | |
| --- | --- | --- | --- | --- | --- |
|  | 1 | 2 | 3 | 4 | 5 |
| A | .99 | - | - | - | - |
| B | .99 | .98 | - | - | - |
| C | .99 | .99 | - | - | - |
| E | .99 | .98 | .99 | .97 | .97 |

*Note*. The levels and factor numbers correspond to the alphanumeric label given to each factor in our model.

**Supplementary Materials C – Description of analytical decisions that guided the model’s development**

Results from the parallel analysis and Velicer’s MAP test suggested that the maximum number of factors to extract were 6 and 8 respectively. However, inspection of the factor loadings from each level of the model indicated that not all factors in the 6-, 7- and 8-factor models were well-defined. Thus, the 5-factor model was designated as the bottom-most level of the hierarchy.

In line with the Extended BassAckwards procedure, all but two highly correlated and statistically redundant strings of factors were removed from the preliminary model. Although factors b1 and a1 were highly correlated (*r* = .96), a1 represents the “general factor” at the apex of the hierarchy and was therefore conceptually important to retain. Similarly, although factors b2 and e2 are near identical (*r* = .99), the removal of b2 would have obscured the hierarchical relationships between mental health and neurodevelopment at the lower levels (i.e., levels C and E). For instance, the removal of b2 would have resulted in tracing factors c1 and c2 back to a1. This leads to an artificial inflation of the association between psychological problems and the neurodevelopmental constructs captured by c1 and c2 because a1 consists of all indicators within the model (including all the indicators that load onto c1 and c2) and will, by default, appear highly correlated with the level C factors. This inflation was indeed observed (*r*a1, c1 = .92, *r*a1, c2 = .84; *r*b2, c1 = .62, *r*b2, c2 = .64).

**Supplementary Materials D – Within-Level Factor Correlations and Remaining Factor Loadings**

Table S3. *Within-Level Factor Correlations*

|  | b1 | b2 | c1 | c2 | e1 | e2 | e3 | e4 |
| --- | --- | --- | --- | --- | --- | --- | --- | --- |
| b1 | 1.00 | - | - | - | - | - | - | - |
| b2 | .664 | 1.00 | - | - | - | - | - | - |
| c1 | - | - | 1.00 | - | - | - | - | - |
| c2 | - | - | .663 | 1.00 | - | - | - | - |
| e1 | - | - | - | - | 1.00 | - | - | - |
| e2 | - | - | - | - | .593 | 1.00 | - | - |
| e3 | - | - | - | - | .597 | .573 | 1.00 | - |
| e4 | - | - | - | - | - .646 | - .521 | - .558 | 1.00 |
| e5 | - | - | - | - | .548 | .385 | .571 | - .505 |

Table S4. *Standardised Factor Loadings for Level 1 of our Model*

|  | **A1 - General Factor** |
| --- | --- |
| SRS Social Communication | 0.891 |
| SRS Social Cognition | 0.876 |
| SRS Restricted Interests/Repetitive Behaviours | 0.855 |
| CCC Social Relations | -0.831 |
| CCC Nonverbal Communication | -0.823 |
| AQ Attention Switching | 0.814 |
| AQ Communication | 0.809 |
| CBCL Social Problems | 0.803 |
| SRS Social Awareness | 0.796 |
| SRS Social Motivation | 0.791 |
| CCC Use of Context | -0.784 |
| CBCL Attention Problems | 0.768 |
| Conners Social Problems | 0.757 |
| AQ Social Skills | 0.753 |
| ABC Irritability | 0.735 |
| CCC Inappropriate Initiation | -0.733 |
| CDI Functional Problems | 0.728 |
| Conners Hyperactivity/Impulsivity | 0.727 |
| ABC Hyperactivity | 0.727 |
| CCC Interests | -0.726 |
| CBCL Thought Problems | 0.722 |
| ABC Lethargy/Social Withdrawal | 0.711 |
| SDQ Peer Problems | 0.710 |
| Conners Oppositional | 0.710 |
| CBCL Withdrawn-Depressed | 0.710 |
| CBCL Aggression | 0.708 |
| CCC Stereotyped Language | -0.707 |
| CCC Coherence | -0.706 |
| Conners Cognitive Problems/Inattention | 0.698 |
| SDQ Hyperactivity | 0.680 |
| CBCL Anxious-Depressed | 0.671 |
| CDI Emotional Problems | 0.667 |
| SWAN Inattention | 0.666 |
| SDQ Emotional Symptoms | 0.661 |
| ABC Inappropriate Speech | 0.654 |
| SWAN Hyperactivity/Impulsivity | 0.652 |
| ABC Stereotypy | 0.646 |
| Conners Anxious-Shy | 0.629 |
| CCC Semantics | -0.621 |
| CBCL Rule-Breaking Behaviours | 0.621 |
| SDQ Conduct Problems | 0.621 |
| Conners Perfectionism | 0.604 |
| AQ Imagination | 0.598 |
| SCAS Panic Agoraphobia | 0.565 |
| SCAS Generalised Anxiety | 0.559 |
| SCAS Separation Anxiety | 0.553 |
| CBCL Somatic | 0.550 |
| SCAS Social Phobia | 0.540 |
| Conners Psychosomatic | 0.520 |
| SCAS Obsessive-Compulsive | 0.510 |
| SDQ Prosocial | -0.499 |
| SCAS Physical Injury | 0.487 |
| CCC Syntax | -0.417 |
| CCC Speech | -0.413 |
| AQ Attention to Detail | 0.350 |

Table S5. *Standardised Factor Loadings for Level 2 of our Model*

|  | **B1 - Neurodevelopment** |
| --- | --- |
| AQ Communication | 0.965 |
| SRS Social Awareness | 0.939 |
| SRS Social Communication | 0.939 |
| CCC Nonverbal Communication | -0.884 |
| SRS Social Cognition | 0.854 |
| CCC Coherence | -0.844 |
| CCC Use of Context | -0.841 |
| SRS Restricted Interests/Repetitive Behaviours | 0.825 |
| CCC Inappropriate Initiation | -0.790 |
| SDQ Hyperactivity | 0.781 |
| SWAN Inattention | 0.772 |
| CCC Social Relations | -0.752 |
| SWAN Hyperactivity/Impulsivity | 0.750 |
| AQ Social Skills | 0.749 |
| CCC Stereotyped Language | -0.744 |
| AQ Imagination | 0.740 |
| SDQ Peer Problems | 0.703 |
| Conners Hyperactivity/Impulsivity | 0.701 |
| ABC Hyperactivity | 0.701 |
| SDQ Prosocial | -0.681 |
| CCC Interests | -0.672 |
| CCC Semantics | -0.660 |
| AQ Attention Switching | 0.643 |
| CBCL Attention Problems | 0.635 |
| Conners Social Problems | 0.626 |
| CCC Syntax | -0.595 |
| ABC Inappropriate Speech | 0.578 |
| SDQ Conduct Problems | 0.556 |
| Conners Cognitive Problems/Inattention | 0.543 |
| ABC Stereotypy | 0.523 |
| SRS Social Motivation | 0.513 |
| ABC Lethargy/Social Withdrawal | 0.509 |
| Conners Oppositional | 0.506 |
| CBCL Rule-Breaking Behaviours | 0.503 |
| CDI Functional Problems | 0.502 |
| ABC Irritability | 0.485 |
| CBCL Aggression | 0.478 |
| CBCL Social Problems | 0.468  (*b2, .421*) |
| CCC Speech | -0.463 |
| AQ Attention to Detail | 0.224  (*b2*, *.160*) |
|  | **B2 – Psychological Problems** |
| SCAS Generalised Anxiety | 0.948 |
| SDQ Emotional Symptoms | 0.939 |
| CBCL Anxious-Depressed | 0.926 |
| CBCL Somatic | 0.907 |
| SCAS Panic Agoraphobia | 0.793 |
| Conners Psychosomatic | 0.784 |
| SCAS Separation Anxiety | 0.766 |
| SCAS Social Phobia | 0.750 |
| Conners Anxious-Shy | 0.749 |
| CDI Emotional Problems | 0.655 |
| SCAS Obsessive-Compulsive | 0.619 |
| SCAS Physical Injury | 0.572 |
| CBCL Withdrawn-Depressed | 0.504 |
| Conners Perfectionism | 0.481 |
| CBCL Thought Problems | 0.428  (*b1, .379*) |

Table S6. *Standardised Factor Loadings for Level 2 of our Model*

|  | C1 - Communication, Social Differences, and Ritualised Behaviours |
| --- | --- |
| CCC Use of Context | -0.926 |
| AQ Communication | 0.914 |
| AQ Imagination | 0.890 |
| AQ Social Skills | 0.870 |
| CCC Nonverbal Communication | -0.867 |
| SRS Social Communication | 0.826 |
| CCC Stereotyped Language | -0.819 |
| CCC Coherence | -0.812 |
| SRS Social Awareness | 0.767 |
| SRS Social Cognition | 0.761 |
| SRS Restricted Interests/Repetitive Behaviours | 0.742 |
| CCC Interests | -0.726 |
| CCC Social Relations | -0.685 |
| CCC Semantics | -0.664 |
| AQ Attention Switching | 0.649 |
| SRS Social Motivation | 0.632 |
| CCC Syntax | -0.627 |
| SDQ Peer Problems | 0.620 |
| CCC Inappropriate Initiation | -0.571 |
| CCC Speech | -0.524 |
| SDQ Prosocial | -0.471 |
| ABC Lethargy/Social Withdrawal | 0.442 |
| Conners Social Problems | 0.431 |
| AQ Attention to Detail | 0.376 |
| ABC Stereotypy | 0.348 |
|  | C2 – Inattention, Hyperactivity/Impulsivity, Emotional & Behavioural Dysregulation |
| ABC Hyperactivity | 0.978 |
| SDQ Conduct Problems | 0.970 |
| CBCL Aggression | 0.945 |
| Conners Oppositional | 0.846 |
| CBCL Rule-Breaking Behaviours | 0.844 |
| ABC Irritability | 0.826 |
| SWAN Hyperactivity/Impulsivity | 0.781 |
| Conners Hyperactivity/Impulsivity | 0.776 |
| SDQ Hyperactivity | 0.667 |
| ABC Inappropriate Speech | 0.556 |
| CBCL Attention Problems | 0.535 |
| SWAN Inattention | 0.533 |
| Conners Cognitive Problems/Inattention | 0.505 |
| CDI Functional Problems | 0.436 |
| CBCL Social Problems | 0.382  *(c1, .208)* |

**Supplementary Materials E – Multiple Regression Results**

Table S7. Multiple regression output for factor score and BCE predictive validity of Vineland Adaptive Behaviour Composite

|  | Standardised estimate (*β*) | Standard error | *p* value |
| --- | --- | --- | --- |
| Factor A1 (‘General’) | - .696 | .719 | < .001 |
| Factor B1 (‘Neurodevelopment’) | - .891 | .855 | < .001 |
| Factor B2 (‘Psychological Problems’) | .189 | .671 | < .001 |
| Factor C1 (‘Communication, Social Differences & Ritualised Behaviours’) | - .608 | .687 | < .001 |
| Factor C2 (‘Emo & Behav Dysreg, Inatt, Hyp) | - .311 | .506 | < .001 |
| Factor E1 (‘Soc. Comm & Rit. Behav.’) | - .448 | 1.044 | < .001 |
| Factor E2 (‘Psychological Problems’) | .077 | .762 | .212 |
| Factor E3 (‘Emo/Behav Dysreg’) | .061 | .627 | .334 |
| Factor E4 (‘Communication’) | .118 | .836 | .032 |
| Factor E5 (‘Inatt/Hyp’) | - .460 | .723 | < .001 |
| BCE – Autism | - .409 | 1.428 | < .001 |
| BCE – ADHD | - .273 | 1.706 | < .001 |
| BCE – Anxiety | - .085 | 1.287 | .023 |
| BCE – Depression | - .001 | 1.966 | .956 |
| BCE – Emotional Difficulty | - .048 | 1.474 | < .001 |
| BCE – Other Neurodevelopmental | - .147 | 1.768 | < .001 |
| BCE – Other Diagnosis | - .052 | 8.918 | .385 |

Table S8. Multiple regression output for factor score and BCE predictive validity of Vineland Daily Living Skills

|  | Standardised estimate (*β*) | Standard error | *p* value |
| --- | --- | --- | --- |
| Factor A1 (‘General’) | - .608 | .726 | < .001 |
| Factor B1 (‘Neurodevelopment’) | - .686 | 1.087 | < .001 |
| Factor B2 (‘Psychological Problems’) | .060 | .837 | .348 |
| Factor C1 (‘Communication, Social Differences & Ritualised Behaviours’) | - .474 | .964 | < .001 |
| Factor C2 (‘Emo & Behav Dysreg, Inatt, Hyp) | - .305 | .699 | < .001 |
| Factor E1 (‘Soc. Comm & Rit. Behav.’) | - .275 | 1.380 | .001 |
| Factor E2 (‘Psychological Problems’) | - .064 | .898 | .353 |
| Factor E3 (‘Emo/Behav Dysreg’) | .101 | .829 | .201 |
| Factor E4 (‘Communication’) | .108 | 1.084 | .108 |
| Factor E5 (‘Inatt/Hyp’) | - .441 | .928 | < .001 |
| BCE – Autism | - .354 | 1.558 | < .001 |
| BCE – ADHD | - .247 | 1.867 | < .001 |
| BCE – Anxiety | - .075 | 1.453 | .060 |
| BCE – Depression | - .036 | 2.378 | .228 |
| BCE – Emotional Difficulty | - .030 | 3.612 | .132 |
| BCE – Other Neurodevelopmental | - .101 | 2.307 | .033 |
| BCE – Other Diagnosis | - .070 | 9.378 | .237 |

Table S9. Multiple regression output for factor score and BCE predictive validity of Vineland Communication

|  | Standardised estimate (*β*) | Standard error | *p* value |
| --- | --- | --- | --- |
| Factor A1 (‘General’) | - .619 | .690 | < .001 |
| Factor B1 (‘Neurodevelopment’) | - .795 | .925 | < .001 |
| Factor B2 (‘Psychological Problems’) | .171 | .760 | .006 |
| Factor C1 (‘Communication, Social Differences & Ritualised Behaviours’) | - .570 | .806 | < .001 |
| Factor C2 (‘Emo & Behav Dysreg, Inatt, Hyp) | - .245 | .544 | < .001 |
| Factor E1 (‘Soc. Comm & Rit. Behav.’) | - .215 | 1.026 | .002 |
| Factor E2 (‘Psychological Problems’) | - .028 | .906 | .713 |
| Factor E3 (‘Emo/Behav Dysreg’) | .152 | .674 | .029 |
| Factor E4 (‘Communication’) | .268 | .968 | < .001 |
| Factor E5 (‘Inatt/Hyp’) | - .479 | .734 | < .001 |
| BCE – Autism | - .318 | 1.506 | < .001 |
| BCE – ADHD | - .254 | 1.746 | < .001 |
| BCE – Anxiety | - .080 | 1.425 | .055 |
| BCE – Depression | .077 | 2.474 | .019 |
| BCE – Emotional Difficulty | - .008 | 1.470 | .348 |
| BCE – Other Neurodevelopmental | - .202 | 1.905 | < .001 |
| BCE – Other Diagnosis | - .005 | 7.570 | .922 |

Table S10. Multiple regression output for factor score and BCE predictive validity of Vineland Socialisation

|  | Standardised estimate (*β*) | Standard error | *p* value |
| --- | --- | --- | --- |
| Factor A1 (‘General’) | - .704 | .782 | < .001 |
| Factor B1 (‘Neurodevelopment’) | - .973 | .927 | < .001 |
| Factor B2 (‘Psychological Problems’) | .275 | .741 | < .001 |
| Factor C1 (‘Communication, Social Differences & Ritualised Behaviours’) | - .656 | .697 | < .001 |
| Factor C2 (‘Emo & Behav Dysreg, Inatt, Hyp’) | - .290 | .527 | < .001 |
| Factor E1 (‘Soc. Comm & Rit. Behav.’) | - .686 | .981 | < .001 |
| Factor E2 (‘Psychological Problems’) | .288 | .774 | < .001 |
| Factor E3 (‘Emo/Behav Dysreg’) | - .131 | .678 | .033 |
| Factor E4 (‘Communication’) | .083 | .808 | .080 |
| Factor E5 (‘Inatt/Hyp’) | - .246 | .787 | < .001 |
| BCE – Autism | - .466 | 1.605 | < .001 |
| BCE – ADHD | - .191 | 1.709 | < .001 |
| BCE – Anxiety | - .039 | 1.501 | .324 |
| BCE – Depression | - .027 | 2.546 | .380 |
| BCE – Emotional Difficulty | - .098 | 5.189 | < .001 |
| BCE – Other Neurodevelopmental | - .144 | 2.406 | .002 |
| BCE – Other Diagnosis | - .075 | 10.176 | .221 |

Table S11. Multiple regression output for factor score and BCE predictive validity of CHIP-CE Satisfaction with Life

|  | Standardised estimate (*β*) | Standard error | *p* value |
| --- | --- | --- | --- |
| Factor A1 (‘General’) | - .446 | .072 | < .001 |
| Factor B1 (‘Neurodevelopment’) | - .232 | .080 | .004 |
| Factor B2 (‘Psychological Problems’) | - .241 | .71 | .001 |
| Factor C1 (‘Communication, Social Differences & Ritualised Behaviours’) | - .247 | .071 | .001 |
| Factor C2 (‘Emo & Behav Dysreg, Inatt, Hyp’) | - .219 | .055 | < .001 |
| Factor E1 (‘Soc. Comm & Rit. Behav.’) | - .178 | .100 | .074 |
| Factor E2 (‘Psychological Problems’) | - .195 | .087 | .025 |
| Factor E3 (‘Emo/Behav Dysreg’) | - .053 | .063 | .407 |
| Factor E4 (‘Communication’) | .094 | .083 | .257 |
| Factor E5 (‘Inatt/Hyp’) | .019 | .079 | .812 |
| BCE – Autism | - .222 | .120 | < .001 |
| BCE – ADHD | - .089 | .125 | .147 |
| BCE – Anxiety | - .108 | .142 | .081 |
| BCE – Depression | - .100 | .357 | .098 |
| BCE – Emotional Difficulty | - .094 | .306 | .002 |
| BCE – Other Neurodevelopmental | - .098 | .177 | .112 |
| BCE – Other Diagnosis | - .130 | .322 | < .001 |

Table S12. Multiple regression output for factor score and BCE predictive validity of CHIP-CE Comfort

|  | Standardised estimate (*β*) | Standard error | *p* value |
| --- | --- | --- | --- |
| Factor A1 (‘General’) | - .551 | .053 | < .001 |
| Factor B1 (‘Neurodevelopment’) | - .100 | .071 | .158 |
| Factor B2 (‘Psychological Problems’) | - .471 | .063 | < .001 |
| Factor C1 (‘Communication, Social Differences & Ritualised Behaviours’) | - .334 | .071 | < .001 |
| Factor C2 (‘Emo & Behav Dysreg, Inatt, Hyp’) | - .209 | .047 | < .001 |
| Factor E1 (‘Soc. Comm & Rit. Behav.’) | - .045 | .077 | .563 |
| Factor E2 (‘Psychological Problems’) | - .581 | .066 | < .001 |
| Factor E3 (‘Emo/Behav Dysreg’) | .167 | .053 | .001 |
| Factor E4 (‘Communication’) | .175 | .065 | .007 |
| Factor E5 (‘Inatt/Hyp’) | - .037 | .074 | .618 |
| BCE – Autism | - .157 | .119 | .008 |
| BCE – ADHD | - .131 | .116 | .022 |
| BCE – Anxiety | - .232 | .139 | < .001 |
| BCE – Depression | - .145 | .302 | .005 |
| BCE – Emotional Difficulty | - .028 | .498 | .567 |
| BCE – Other Neurodevelopmental | - .123 | .181 | .051 |
| BCE – Other Diagnosis | - .111 | .343 | .001 |

Table S13. Multiple regression output for factor score and BCE predictive validity of CHIP-CE Resilience

|  | Standardised estimate (*β*) | Standard error | *p* value |
| --- | --- | --- | --- |
| Factor A1 (‘General’) | - .235 | .078 | .003 |
| Factor B1 (‘Neurodevelopment’) | - .253 | .093 | .006 |
| Factor B2 (‘Psychological Problems’) | - .005 | .087 | .950 |
| Factor C1 (‘Communication, Social Differences & Ritualised Behaviours’) | - .174 | .077 | .023 |
| Factor C2 (‘Emo & Behav Dysreg, Inatt, Hyp’) | - .108 | .063 | .088 |
| Factor E1 (‘Soc. Comm & Rit. Behav.’) | - .277 | .094 | .003 |
| Factor E2 (‘Psychological Problems’) | .040 | .102 | .693 |
| Factor E3 (‘Emo/Behav Dysreg’) | - .061 | .075 | .417 |
| Factor E4 (‘Communication’) | - .048 | .102 | .643 |
| Factor E5 (‘Inatt/Hyp’) | - .013 | .093 | .887 |
| BCE – Autism | - .182 | .122 | .003 |
| BCE – ADHD | - .017 | .136 | .797 |
| BCE – Anxiety | - .012 | .144 | .844 |
| BCE – Depression | .060 | .328 | .282 |
| BCE – Emotional Difficulty | .005 | .126 | .697 |
| BCE – Other Neurodevelopmental | - .004 | .184 | .956 |
| BCE – Other Diagnosis | - .133 | .581 | .021 |

Table S14. Multiple regression output for factor score and BCE predictive validity of CHIP-CE Risk Aversion

|  | Standardised estimate (*β*) | Standard error | *p* value |
| --- | --- | --- | --- |
| Factor A1 (‘General’) | - .523 | .058 | < .001 |
| Factor B1 (‘Neurodevelopment’) | - .559 | .081 | < .001 |
| Factor B2 (‘Psychological Problems’) | - .010 | .067 | .887 |
| Factor C1 (‘Communication, Social Differences & Ritualised Behaviours’) | - .212 | .065 | .001 |
| Factor C2 (‘Emo & Behav Dysreg, Inatt, Hyp’) | - .397 | .050 | < .001 |
| Factor E1 (‘Soc. Comm & Rit. Behav.’) | .016 | .071 | .822 |
| Factor E2 (‘Psychological Problems’) | .254 | .067 | .003 |
| Factor E3 (‘Emo/Behav Dysreg’) | - .492 | .055 | < .001 |
| Factor E4 (‘Communication’) | .247 | .055 | < .001 |
| Factor E5 (‘Inatt/Hyp’) | - .310 | .054 | < .001 |
| BCE – Autism | - .085 | .111 | < .001 |
| BCE – ADHD | - .306 | .111 | < .001 |
| BCE – Anxiety | - .039 | .138 | .324 |
| BCE – Depression | - .019 | .275 | .380 |
| BCE – Emotional Difficulty | - .111 | .606 | < .001 |
| BCE – Other Neurodevelopmental | - .148 | .171 | .002 |
| BCE – Other Diagnosis | .041 | .334 | .221 |

Table S15. Multiple regression output for factor score and BCE predictive validity of CHIP-CE Achievement

|  | Standardised estimate (*β*) | Standard error | *p* value |
| --- | --- | --- | --- |
| Factor A1 (‘General’) | - .529 | .057 | < .001 |
| Factor B1 (‘Neurodevelopment’) | - .597 | .075 | < .001 |
| Factor B2 (‘Psychological Problems’) | .018 | .064 | .773 |
| Factor C1 (‘Communication, Social Differences & Ritualised Behaviours’) | - .428 | .058 | < .001 |
| Factor C2 (‘Emo & Behav Dysreg, Inatt, Hyp’) | - .214 | .042 | < .001 |
| Factor E1 (‘Soc. Comm & Rit. Behav.’) | - .313 | .081 | < .001 |
| Factor E2 (‘Psychological Problems’) | - .068 | .069 | .325 |
| Factor E3 (‘Emo/Behav Dysreg’) | .067 | .048 | .163 |
| Factor E4 (‘Communication’) | .043 | .071 | .548 |
| Factor E5 (‘Inatt/Hyp’) | - .375 | .069 | < .001 |
| BCE – Autism | - .232 | .104 | < .001 |
| BCE – ADHD | - .213 | .108 | < .001 |
| BCE – Anxiety | - .182 | .117 | < .001 |
| BCE – Depression | - .012 | .380 | .849 |
| BCE – Emotional Difficulty | - .038 | .345 | .272 |
| BCE – Other Neurodevelopmental | - .286 | .147 | < .001 |
| BCE – Other Diagnosis | - .032 | .178 | .070 |

**Supplementary Materials F – CHIP-CE Re-norming and Internal Consistency**

CHIP-CE *z*-score recalculations

Preliminary data cleaning of the CHIP-CE scales revealed implausible scaled scores (e.g., *T*-scores < 0). Such a range of scores was not seen in any other measure that utilised *T*-scores (refer to Appendix B for full descriptive statistics from each measure). Following this, the first author manually checked every raw score corresponding to these scaled scores to confirm their validity before manually re-calculating the *T*-scores based on the available scoring information from the CHIP-CE manual. As this process revealed no anomalies, the authorship team concluded that the MAGNET participants represented a significantly different population to that of the original normative sample. Thus, the CHIP-CE raw scores have been reported for descriptive purposes and *z*-scores controlling for age and sex were re-calculated for the *Satisfaction*, *Comfort*, *Risk Aversion*, and *Achievement* subscales and utilised in subsequent analyses.

CHIP-CE internal consistency

Following from the previous analyses, we calculated the internal consistency of each CHIP-CE subscale on SPSS. McDonald’s Omega (*ω*) values for each subscale are shown in Table S16. All subscales except for the *Resilience* subscale demonstrated adequate internal consistency for use within research (i.e., *ω >* .70; Furr & Bacharach, 2013).

Table S16 – Internal consistency results for CHIP-CE subscales

| CHIP-CE Subscale | McDonald’s *ω* |
| --- | --- |
| Satisfaction | .883 |
| Comfort | .877 |
| Resilience | .672 |
| Risk Aversion | .816 |
| Achievement | .840 |
